# Phylogenetic diversity and dietary association of rumen *Treponema* revealed using group-specific 16S rRNA gene-based analysis

Aschalew Z. Bekele, Satoshi Koike & Yasuo Kobayashi

Graduate School of Agriculture, Hokkaido University, Sapporo, Japan

**Correspondence:** Satoshi Koike, Graduate School of Agriculture, Hokkaido University, Sapporo 060-8589, Japan. Tel.: +81 11 706 2812; fax: +81 11 706 2814; e-mail: skoike7@anim.agr.hokudai.ac.jp

Received 12 October 2010; revised 7 November 2010; accepted 2 December 2010.  
Final version published online 17 January 2011.

DOI:10.1111/j.1574-6968.2010.02191.x

Editor: Rustam Aminov

## Keywords

rumen; *Treponema*; diversity; diet association; 16S rRNA gene.

## Abstract

*Treponema* spp. are a commonly detected bacterial group in the rumen that are involved in the degradation of soluble fibers. In this study, a ruminal *Treponema* group-specific PCR primer targeting the 16S rRNA gene was designed and used to assess the phylogenetic diversity and diet association of this group in sheep rumen. Total DNA was extracted from rumen digesta of three sheep fed a diet based on alfalfa/orchardgrass hay or concentrate. The real-time PCR quantification indicated that the relative abundance of the *Treponema* group in the total rumen bacteria was as high as 1.05%, while the known species *Treponema bryantii* accounted for only 0.02%. Fingerprints of the *Treponema* community determined by 16S rDNA-targeted denaturing gradient gel electrophoresis (DGGE) analysis tended to differ among the diets. Principal component analysis of the DGGE profiles distinguished those *Treponema* associated with either the hay or the concentrate diets. Analysis of a *Treponema* 16S rRNA gene clone library showed phylogenetically distinct operational taxonomic units for a specific dietary condition, and significant ( $P=0.001$ ) differences in community composition were observed among clone libraries constructed from each dietary regimen. The majority of clones (75.4%) had < 97% sequence similarity with known *Treponema*. These results suggest the predominance of uncultured *Treponema* that appear to have distinct members related to the digestion of either hay or concentrate diet.

## Introduction

The distribution of spiral-shaped bacteria (spirochetes) and their role in the degradation of plant material in the rumen have been reported by different workers (Bryant, 1952; Stanton & Canale-Parola, 1979; Ziiolecki & Wojciechowicz, 1980). Direct microscopic enumeration of spirochetes showed up to  $2.0 \times 10^8$  cells mL<sup>-1</sup> of bovine rumen fluid (Stanton & Canale-Parola, 1979), which is comparable to the population density of common rumen bacterial species (Bryant & Burkey, 1953). All strains of spirochetes isolated from the rumen have been classified in the genus *Treponema*, comprised of three described species: *Treponema bryantii* (Stanton & Canale-Parola, 1980), *Treponema saccharophilum* (Paster & Canale-Parola, 1985) and *Treponema ziioleckii* (Piknova *et al.*, 2008). Rumen *Treponema* strains are able to degrade plant polysaccharides (Ziiolecki, 1979), and *in vitro* studies have shown a beneficial interaction of *T. bryantii*

with the cellulolytic bacterium *Fibrobacter succinogenes* (Stanton & Canale-Parola, 1980).

Recent application of molecular techniques in the study of microbial ecology demonstrated the existence of a considerable proportion of diverse uncultivated spirochetes involved in chronic disease in the human oral cavity and in degradation of lignocellulose materials in the termite gut (Paster *et al.*, 1996, 2001; Dewhirst *et al.*, 2000). For example, 16S rRNA gene-based clone library analysis of samples from the oral cavity of a human subject and from the hindgut of a single termite species, respectively, suggested some 20 and 23 new species of spirochetes (Choi *et al.*, 1994; Lilburn *et al.*, 1999). Considering the individuality of human microbiota and the existence of ~280 termite genera, these observations suggest the presence of a considerable diversity of spirochetes, particularly uncultured members. In contrast to the above digestive tract environments, our knowledge of the uncultured *Treponema*

community in the rumen is very limited. The current understanding of the rumen *Treponema* diversity is mainly based on earlier cultivation-based studies that showed morphological and physiological variations in rumen spirochetes (Paster *et al.*, 1991; Pikhova *et al.*, 2008). A comprehensive analysis of 16S rRNA gene sequences derived from the rumen showed that rumen *Treponema* were not detected frequently (Edwards *et al.*, 2004; Yang *et al.*, 2010).

However, we had previously retrieved a number of *Treponema* clones related to both cultured and uncultured members from a fiber-associated community (Koike *et al.*, 2003; Shinkai *et al.*, 2010). Based on these data, we speculated that rumen *Treponema* diversity has been underestimated and members of this group may play a metabolic role in fiber degradation. In this study, a ruminal *Treponema* group-specific PCR primer was designed and used to determine the population size, phylogenetic diversity and distribution of the *Treponema* community in the rumen. By comparing 16S rRNA gene sequences from sheep fed different diets, we tested the hypothesis that distinct members of *Treponema* may relate to the digestion of either hay or concentrate diet.

## Materials and methods

### Animals and sampling

All procedures with live animals were approved by the Animal Care and Welfare Committee of Hokkaido University, Japan (Protocol number 09-0046). Three rumen fistulated sheep (average body weight,  $90.7 \pm 6.9$  kg) were used in three consecutive periods corresponding to three dietary regimens. In the first period, each animal was given an alfalfa hay diet ( $1.2 \text{ kg day}^{-1}$ ), and in the second period an orchardgrass hay diet ( $1.2 \text{ kg day}^{-1}$ ). The orchardgrass hay diet was supplemented with soybean meal. In the third period, each animal was fed a concentrate-diet containing 1.0 kg of a commercial formula feed (Ram 76ME, Mercian, Tokyo, Japan) and 0.5 kg of the orchardgrass hay. The three diets were formulated to be isonitrogenous (18.2% crude protein). Each diet was fed for 3 weeks and rumen contents were sampled from individual animals before feeding on the last day of the experimental period. The samples were stored at  $-30^\circ\text{C}$  until DNA was extracted. Throughout the experimental period, animals were kept in individual pens and fed once daily at 09:00 hours. Water and a mineral block was available *ad libitum*.

### DNA extraction

Total DNA was extracted from 0.25 g wet rumen content samples following the RBB+C method according to Yu & Morrison (2004). Briefly, cells were lysed by repeated beating with glass beads (Mini Bead Beater, BioSpec Products, Bartlesville, OK) in the presence of 4% (w/v) sodium dodecyl sulfate, 500 mM NaCl, 50 mM Tris-HCl (pH 8.0)

and 50 mM EDTA. Two different sized (0.1 and 0.5 mm) glass beads were used for disrupting the cells. After incubation of the lysate at  $70^\circ\text{C}$  for 15 min, nucleic acids were recovered by isopropanol precipitation. DNA was treated with DNase-free RNase and proteinase K, and purified by a QIAamp DNA Stool Mini Kit (Qiagen, Hilden, Germany). Purified DNA was quantified by a NanoDrop 2000 spectrophotometer (Thermo Scientific) and the final concentration of DNA extracts was adjusted to  $10 \text{ ng } \mu\text{L}^{-1}$  for use in all downstream applications.

### Design of PCR primer

In order to design a PCR primer targeting rumen *Treponema*, 63 currently available 16S rRNA gene sequences of rumen *Treponema* were obtained from the GenBank database as well as from our clone library sequence collections. Sequences for the three known *Treponema* species were also included in the analysis. In addition, 10 mammalian and 14 termite *Treponema* sequences were included in the *in silico* analysis. The sequences were aligned with CLUSTAL X v.1.81 multiple sequence alignment software (Thompson *et al.*, 1997). The *Treponema* group-specific forward primer was designed based on a region conserved among all rumen *Treponema*, while the universal primer 926R (Watanabe *et al.*, 2001) was chosen as a reverse primer. The nucleotide positions of the target site for the forward primer on *T. bryantii* 16S rRNA gene sequences were 380–400 while those of the reverse primer were 934–953, yielding a 575-bp PCR product. The primer set was designed to cover all rumen *Treponema* and named g-TrepoF. The online BASIC LOCAL ALIGNMENT SEARCH TOOL (BLAST) program (<http://blast.ncbi.nlm.nih.gov/Blast.cgi>) was used to determine the specificity of the forward primer. The specificity of the primers was further tested by PCR amplification using genomic DNA from pure cultures of 16 representative rumen bacterial strains including *T. bryantii* ATCC33254, *F. succinogenes* ATCC19169, *Ruminococcus albus* 8, *Ruminococcus flavefaciens* C94, *Prevotella ruminicola* 23, *Prevotella bryantii* B<sub>14</sub>, *Prevotella brevis* GA33, *Butyrivibrio fibrisolvens* H17c, *B. fibrisolvens* D1, *Eubacterium ruminantium* GA195, *Selenomonas ruminantium* GA192, *Succinivibrio dextrinosolvens* ATCC19716, *Succinimonas amylolytica* ATCC19206, *Streptococcus bovis* ATCC33317, *Megasphaera elsdenii* ATCC25940 and *Anaerovibrio lipolytica* ATCC33276. Rumen *Treponema* group-specific clone libraries constructed using the primers also served to confirm primer specificity. The sequences of all primers used in this study are shown in Table 1.

### Real-time PCR quantification of the 16S rRNA gene

Plasmid DNA to be used as the standard in real-time PCR was obtained by cloning of 16S rRNA gene PCR products

**Table 1.** PCR primers used in this study

| Target                    | Primer sequences (5'–3')       | Annealing temperature (°C) | Extension time (s) | Product size (bp) | Efficiency | Reference                     |
|---------------------------|--------------------------------|----------------------------|--------------------|-------------------|------------|-------------------------------|
| Total bacteria            | BAC341F ACTCCTACGGGAGGCAG      | 57                         | 19                 | 465               | 1.92       | Stevenson & Weimer (2007)     |
|                           | BAC 805R GACTACCAGGTATCTAATCC  |                            |                    |                   |            | Stevenson & Weimer (2007)     |
| Rumen                     | g-TrepoF GGCAGCAGCTAAGAATATTCC | 64                         | 23                 | 575               | 1.91       | This study                    |
| <i>Treponema</i> -group   | BAC926R CCGTCAATTCCTTTGATTT    | 57                         | 18                 | 421               | 1.95       | Watanabe <i>et al.</i> (2001) |
| <i>Treponema bryantii</i> | T. bryF AGTCGAGCGGTAAGATTG     |                            |                    |                   |            | Tajima <i>et al.</i> (2001)   |
|                           | T. bryR CAAAGCGTTTCTCTACT      |                            |                    |                   |            | Tajima <i>et al.</i> (2001)   |

into *Escherichia coli* JM109 cells, as described previously (Koike *et al.*, 2007). For *Treponema* group-specific PCR as well as *T. bryantii*-specific PCR, a 16S rRNA gene fragment of *T. bryantii* ATCC33254 was used to prepare a plasmid DNA standard as reported previously (Bekele *et al.*, 2010). The PCR primers used are shown in Table 1. PCR amplification for the quantification of target bacterial 16S rRNA gene was performed with a LightCycler 2.0 system (Roche Applied Science, Penzberg, Germany) and FastStart DNA Master SYBR Green I (Roche Applied Science). The optimal amplification conditions for each primer pair were achieved with 3.5 mM MgCl<sub>2</sub>. The 20 µL reaction mixture contained 2.5 mM MgCl<sub>2</sub>, 2 µL 10 × Mastermix (containing FastStart Taq DNA polymerase, reaction buffer, dNTP mixture, 1 mM MgCl<sub>2</sub> and SYBR Green I dye), 0.5 µM of each primer and 10 ng template DNA. The thermal profile consisted of denaturation at 95 °C for 10 min, followed by 40 cycles of 95 °C for 15 s, annealing at the temperature indicated for the primer pair (Table 1) for 5 s and 72 °C for an appropriate extension time (Table 1). Dissociation curve analysis was performed to ascertain the specificity of amplicons by slow heating with a 0.1 °C s<sup>-1</sup> increment from 70 to 95 °C, with fluorescence collection at 0.1 °C intervals. A 10-fold dilution series of the plasmid DNA standard for the respective target bacterial 16S rRNA gene was run along with the samples. The respective genes were quantified using standard curves obtained from the amplification profile of known concentrations of the plasmid DNA standard. To obtain the relative abundance of *Treponema* in the rumen, the assay values for 16S rRNA genes of the target group or species were normalized to the total number of copies of rumen bacterial 16S rRNA genes. The normalized assay values were analyzed statistically by single-factor ANOVA at a level of significance of 0.05.

### ***Treponema*-specific 16S rDNA denaturing gradient gel electrophoresis (DGGE)**

DGGE was used to examine the relationship between diet and the rumen *Treponema* community. The analysis was

carried out in a Bio-Rad DCode Universal Mutation Detection System (Bio-Rad Laboratories, Hercules, CA). The g-TrepoF and BAC926R primers used for real-time PCR were used to amplify the V3–V5 regions of the 16S rRNA gene of *Treponema* in the sheep rumen samples. Genomic DNA from *T. bryantii* ATCC 33254 was also included in the analysis. An amplicon of *c.* 575 bp for DGGE analysis was obtained by modifying the reverse primer by addition of a 40-bp GC clamp (5'CGCCCGCCGCGCGCGGGCGGGCGGGGGCACGGGGGG-3'). PCR was performed with a Veriti 96-well thermal cycler (Applied Biosystems, Singapore). A reaction mixture containing 0.4 µM of each primer, 5 µL of 10 × ExTaq buffer, 0.2 µM of each dNTP, 1.25 U ExTaq polymerase (Takara, Otsu, Japan) and 10 ng of template DNA in a total volume of 50 µL was prepared. The temperature program for cycling consisted of an initial denaturation at 94 °C for 5 min, followed by 30 cycles of 94 °C for 30 s, annealing at 64 °C for 30 s and extension at 72 °C for 30 s with a final extension at 72 °C for 5 min. PCR-amplified 16S rRNA gene fragments were separated using an 8% polyacrylamide gel with 0.5 × TAE buffer (20 mM Tris-acetate, 10 mM sodium acetate, 0.5 mM EDTA, pH 8.0) and a 35–60% linear gradient of denaturant [100% denaturant corresponded to 40% (v/v) deionized formamide and 7 M urea]. Each gel was run at 60 °C, 80 V for 16 h, and then placed in fixing solution (10% ethanol and 0.5% acetic acid) for 2 h, stained in 0.1% (w/v) silver nitrate solution for 20 min and developed in 1.5% sodium hydroxide (w/v), 0.1% sodium borohydride (w/v) and 0.4% formaldehyde (v/v) for 8 min. Thereafter, the gel was rinsed and kept in distilled water until the image was scanned. Gel images were analyzed by BIONUMERICS software version 4.5 (Applied Maths, Kortrijk, Belgium). Normalized banding patterns were used to generate dendrograms by calculating Dice similarity coefficients and by an unweighted pair group method with an arithmetic average clustering algorithm. For statistical analysis, the DGGE banding patterns were converted into binary data as the presence or the absence of bands using BIONUMERICS software, and principal component analysis (PCA) was conducted using the PRIMER 5 data analysis software system (PRIMER-E Ltd, Plymouth, UK).

## 16S rRNA gene clone library construction and sequencing

Three clone libraries were constructed for the respective feeding conditions. Mixed DNA samples obtained from the rumen content DNA from three animals under the same dietary conditions were used for library construction. PCR products were generated by the primers g-TrepoF and BAC926R with the same reaction and amplification conditions described for DGGE with the exception of the reverse primer without GC clamp. PCR products were cloned with a pGEM-T Easy Vector System (Promega, San Luis Obispo, CA) according to the manufacturer's instructions. Clones containing the correct insert were sequenced at Takara Bio (Yokkaichi, Japan). Clone nomenclature was as follows: for the alfalfa and orchardgrass hay-associated *Treponema* libraries, clone names began with ALTC and OGTC, respectively, followed by the clone number. Clone names in the concentrate-associated *Treponema* library began with CTC followed by the clone number. All the sequences were deposited into the GenBank database with the accession numbers AB537568 through AB537880.

## Sequence analysis

A total of 313 16S rRNA gene sequences, obtained from the three clone libraries and representative rumen *Treponema* sequences from the NCBI database, were included in the analysis. The sequences were automatically aligned using CLUSTAL X ver.1.81 multiple sequence alignment software (Thompson *et al.*, 1997). A neighbor-joining tree (Saito & Nei, 1987) with a Kimura-2 correction was constructed in MEGA v.3.1 software. (Tamura *et al.*, 2007). In order to statistically evaluate the branching of the tree, bootstrap analysis (Felsenstein, 1985) was carried out with 1000 resamplings of the data. Sequences from the three rumen *Treponema* clone libraries were compared with 16S rRNA gene sequences in the GenBank database using the BLAST program (Altschul *et al.*, 1990) to obtain similarity values.

Operational taxonomic units (OTUs) were defined based on a 97% sequence identity criterion (Stackebrandt & Goebel, 1994). Analysis of the diversity for the individual and combined libraries was carried out using the nonparametric estimator Chao1 (Chao, 1984) and the Shannon index (Shannon & Weaver, 1949) using FASTGROUPII software. ([http://biome.sdsu.edu/fastgroup/fg\\_tools.htm](http://biome.sdsu.edu/fastgroup/fg_tools.htm)) (Yu *et al.*, 2006). The percentage of coverage of the clone libraries was calculated by Good's method with the formula  $[1 - (n/N)] \times 100$ , where  $n$  is the number of singletons and  $N$  is the total number of sequences (Good, 1953). The statistical differences among the 16S rRNA gene clone libraries from the respective feeding conditions were compared using the WEB-BASED LIBRARY SHUFFLING (WEB-LIBSHUFF) program version 0.96 (<http://libshuff.mib.uga.edu>) (Henriksen, 2004) to de-

termine whether a given pair of libraries was drawn from the same population. The significant difference level for comparison of the three libraries was defined as  $P = 0.0085$ . The sequences were initially aligned by CLUSTAL X and genetic distances were generated in the DNADIST program of the PHYLIP package (v.3.67) (Felsenstein, 2007) using the Jukes–Cantor model before submitting to WEB-LIBSHUFF.

## Results

### Primer specificity and validation

The newly designed g-TrepoF primer showed a 100% sequence match with all ruminal ( $n = 63$ ) and other mammalian ( $n = 10$ ) *Treponema* sequences tested, while 50% of the tested termite ( $n = 14$ ) *Treponema* sequences had a single-nucleotide mismatch in the middle of the primer site (data not shown). Therefore, it was assumed that the g-TrepoF primer covers all rumen *Treponema* and also has a broad coverage of nonruminal *Treponema*. The specificity of the primer (g-TrepoF) for rumen *Treponema* was also validated using an online BLAST similarity search and by PCR amplification of 16 representative rumen bacteria. The BLAST similarity search of the primer sequences showed similarity with 16S rRNA gene sequences of spirochetes. The primer set g-TrepoF and BAC926R did not cross-react with any of the nontarget rumen bacteria tested at the specified PCR conditions, while PCR products of the expected size were obtained from *T. bryantii* genomic DNA (data not shown). The *Treponema* clone libraries constructed from DNA extracts of rumen digesta of sheep also confirmed the specificity of the primers for rumen *Treponema*. No bacterial 16S rRNA gene sequences other than *Treponema* were detected in the libraries.

Although primer sets that yield short amplicons are ideal for real-time PCR amplification, it was difficult to design primers that are specific for *Treponema* and yield a smaller PCR product. The g-TrepoF and the BAC926R primer set yield a relatively large (575 bp) PCR product. However, the standard curve for the assay was comparable to those of the total bacterial and *T. bryantii* species-specific primers producing PCR efficiencies  $> 1.9$  (Table 1). The dissociation curve obtained for the samples had a similar melting point with the standard plasmid DNA, indicating that there were no nonspecific amplifications. The g-TrepoF and BAC926 primers produced a single dissociation curve peak at 90 °C when tested against DNA from *T. bryantii* and when using total rumen microbial DNA.

### Relative abundance of *Treponema* in the rumen

The relative proportions of the 16S rRNA gene copies for the *Treponema* group and *T. bryantii* are shown in Table 2. The mean relative population size of the *Treponema* group in the

total rumen bacteria of sheep fed alfalfa diet was as high as 1.05%, while that of *T. bryantii* was only 0.02%. Although the highest population size of *Treponema* was found in the alfalfa-fed sheep, diet did not significantly affect the *Treponema* group ( $P = 0.648$ ) or the *T. bryantii* ( $P = 0.977$ ) population.

### DGGE banding patterns of rumen *Treponema*

The DNA fingerprints of *T. bryantii* showed a single band, while a number of bands were observed for the other *Treponema* in the rumen content DNA samples from sheep fed different diets. The DGGE profiles of the *Treponema* community associated with the hay (alfalfa and orchardgrass) and concentrate diets showed different banding patterns. The DGGE profiles across diet showed consistently fewer bands (except animal 3) in samples from concentrate-fed animals (Fig. 1). The PCA of the binary data of DGGE profiles distinguished *Treponema* population that

**Table 2.** Percentages of *Treponema* relative to total bacteria in the rumen of sheep fed a hay or concentrate diet as determined by real-time PCR

| Target                        | Alfalfa         | Orchardgrass    | Concentrate     |                 |
|-------------------------------|-----------------|-----------------|-----------------|-----------------|
|                               | Mean $\pm$ SD   | Mean $\pm$ SD   | Mean $\pm$ SD   | <i>P</i> -value |
| Rumen <i>Treponema</i> -group | 1.05 $\pm$ 0.62 | 0.57 $\pm$ 0.26 | 0.92 $\pm$ 0.85 | 0.648           |
| <i>Treponema bryantii</i>     | 0.02 $\pm$ 0.01 | 0.02 $\pm$ 0.01 | 0.02 $\pm$ 0.03 | 0.977           |

associated with either the hay or the concentrate diets resulting in two clusters (Fig. 2), although one exception was observed.

### Sequence diversity and community composition

Based on a 97% sequence similarity criterion, the 313 clone sequences from the combined libraries were grouped into 67 OTUs (Table 3). A similar number of OTUs (30–32) was identified for each diet. Good's coverage of the combined library was 91.1%, while the coverage for the alfalfa, orchardgrass and concentrate libraries was 83.8%, 88.1% and 85.2%, respectively (Table 3). Although the Chao1 estimation was lower for the orchardgrass, the predicted OTUs and the overall level of diversity estimation by the Shannon index were higher for the alfalfa and orchardgrass hay libraries (Table 3), which correlated with the DGGE observation (Fig. 1).

Among the 77 (24.6%, 2 OTUs) clone sequences that showed 97% or more sequence similarity with cultured *Treponema*, 76 were related to *T. bryantii*. Only a single sequence related to *T. zioleckii* and no sequences having 97% or more similarity with *T. saccharophilum* were found. The majority of clones (236 clones, 75.4%) were related to uncultured *Treponema*, irrespective of diet (Table 3). Among the uncultured *Treponema*, 70 clones had 97% or more similarity with sequences of uncultured *Treponema* clones, while 166 clones showed 86–96% similarity (Table 3) with

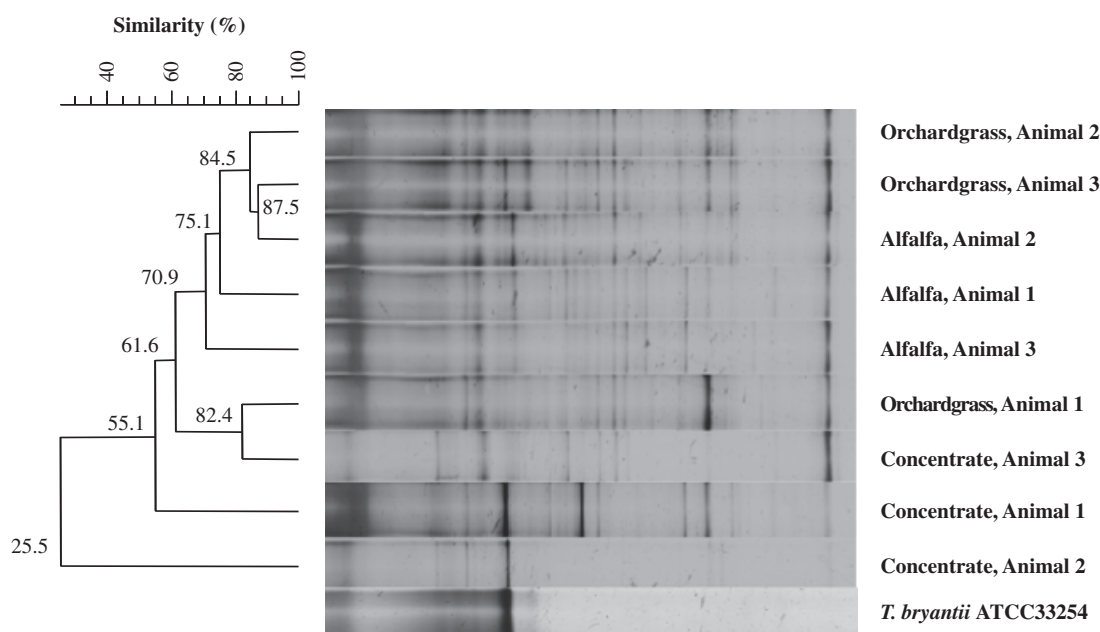

**Fig. 1.** DGGE profiles of rumen *Treponema* 16S rRNA genes derived from rumen samples of sheep fed different diets. Dendrograms were constructed using the unweighted pair group method with arithmetic mean clustering analysis. The figure includes DGGE fingerprints of *Treponema bryantii* ATCC33254. Numbers (1–3) indicate animal ID.

any sequence in the NCBI database. Pairwise comparison of each 16S rRNA gene library using WEB-LIBSHUFF confirmed that the libraries were significantly ( $P=0.001$ ) different from one another (data not shown).

The results of a phylogenetic analysis of the 67 OTUs identified among the combined 16S rRNA gene sequences from the three libraries are shown in Fig. 3. The phylogenetic tree (Fig. 3) was divided into two major clades (clades I and II). Additionally, clade II was further categorized in to subclades (a–e), although this was not supported by higher bootstrap values. The distribution of clones in the different clades was shown by pie charts with the size of the pie charts corresponding to the size of the clones in each clade. In clade I, 59 clones (58.4%) were from the concentrate library, while in clade II 185 clones (87.3%) were from the hay libraries.

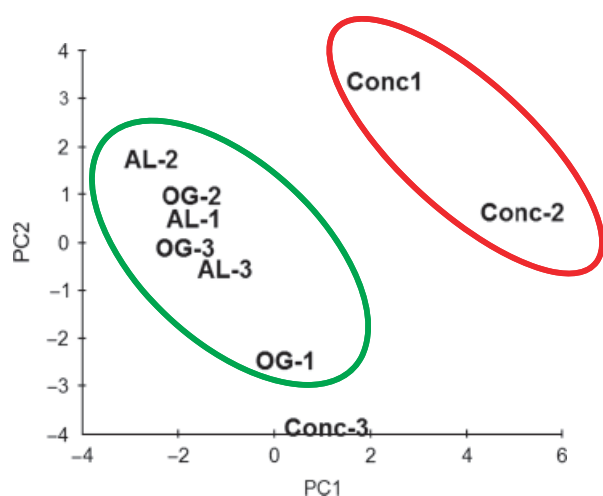

**Fig. 2.** Principal component analysis (PCA) of DGGE fingerprints showing separate clusters for the hay (AL, alfalfa; OG, orchardgrass) and concentrate (Conc) diets. Numbers (1–3) indicate animal ID.

## Discussion

16S rRNA gene-based clone libraries constructed using universal PCR primers have been used to monitor the entire rumen bacterial community (Whitford *et al.*, 1998; Tajima *et al.*, 1999; Koike *et al.*, 2003; Sundset *et al.*, 2007). However, such universal libraries do not sufficiently represent the diversity of specific groups of bacteria in a complex gut environment (Li *et al.*, 2008). Our recent analysis of the rumen *Prevotella* community based on group-specific clone libraries showed the abundance of novel rumen *Prevotella* previously undetected (Bekele *et al.*, 2010), indicating the advantage of this approach. In the present study, we focused on *Treponema*, a frequently detected rumen bacterial group that has been implicated in the degradation of fiber (Koike *et al.*, 2003; Shinkai *et al.*, 2010). A *Treponema* group-specific primer was successfully developed and used to illustrate the diversity and molecular ecology of rumen *Treponema*.

Real-time PCR quantification revealed that the relative abundance of *Treponema* was comparable to or higher than that of the other representative rumen bacteria (Stevenson & Weimer, 2007; Bekele *et al.*, 2010). Therefore, the *Treponema* group may be one of the core members of the rumen bacterial community. The proportion of *T. bryantii* was about 2% in the *Treponema* group (0.02% vs. 1.05%), indicating that the uncultured *Treponema* were more abundant than cultured representatives. Analysis of the *Treponema* 16S rRNA gene libraries supported this finding. Although a single sequence was identified as *T. zioleckii* in the present study, no 16S rRNA gene sequence having 97% or more similarity with *T. saccharophilum* and *T. zioleckii* was reported in previous studies (Whitford *et al.*, 1998; Tajima *et al.*, 1999; Koike *et al.*, 2003). Therefore, *T. saccharophilum* and *T. zioleckii* appear to be minor bacterial species in the rumen.

**Table 3.** Sequence diversity and coverage estimation of individual and combined libraries

|                                  | Alfalfa      | Orchardgrass | Concentrate  | Combined      |
|----------------------------------|--------------|--------------|--------------|---------------|
| Total no. of clones              | 111          | 101          | 101          | 313           |
| Total no. of OTUs                | 32           | 32           | 30           | 67            |
| Chao 1                           | 68.6         | 41.7         | 60.9         | 101           |
| Shannon index                    | 3.22         | 3.12         | 2.88         | 3.64          |
| Good's coverage (%)              | 83.8         | 88.1         | 85.2         | 91.1          |
| Cultured <i>Treponema</i>        |              |              |              | 77 (2 OTUs)   |
| <i>T. bryantii</i> (OTU)         | 47 (1 OTU)   | 19 (1 OTU)   | 10 (1 OTU)   | 76 (1 OTU)    |
| <i>T. saccharophilum</i> , (OTU) | 0            | 0            | 0            | 0             |
| <i>T. zioleckii</i> , (OTU)      | 1 (1 OTU)    | 0            | 0            | 1 (1 OTU)     |
| Uncultured <i>Treponema</i> *    |              |              |              | 236 (65 OTUs) |
| Previously reported (OTU)        | 20 (8 OTUs)  | 22 (6 OTUs)  | 41 (6 OTUs)  | 70 (11 OTUs)  |
| Not reported, (OTU)              | 43 (22 OTUs) | 60 (25 OTUs) | 50 (23 OTUs) | 166 (54 OTUs) |

Numbers in parentheses indicate predicted OTUs from the clones.

\*Clones showing 86–96% sequence similarity with any sequence in the NCBI database were considered as not reported, while those having 97% or more similarity with uncultured clones were grouped as previously reported.



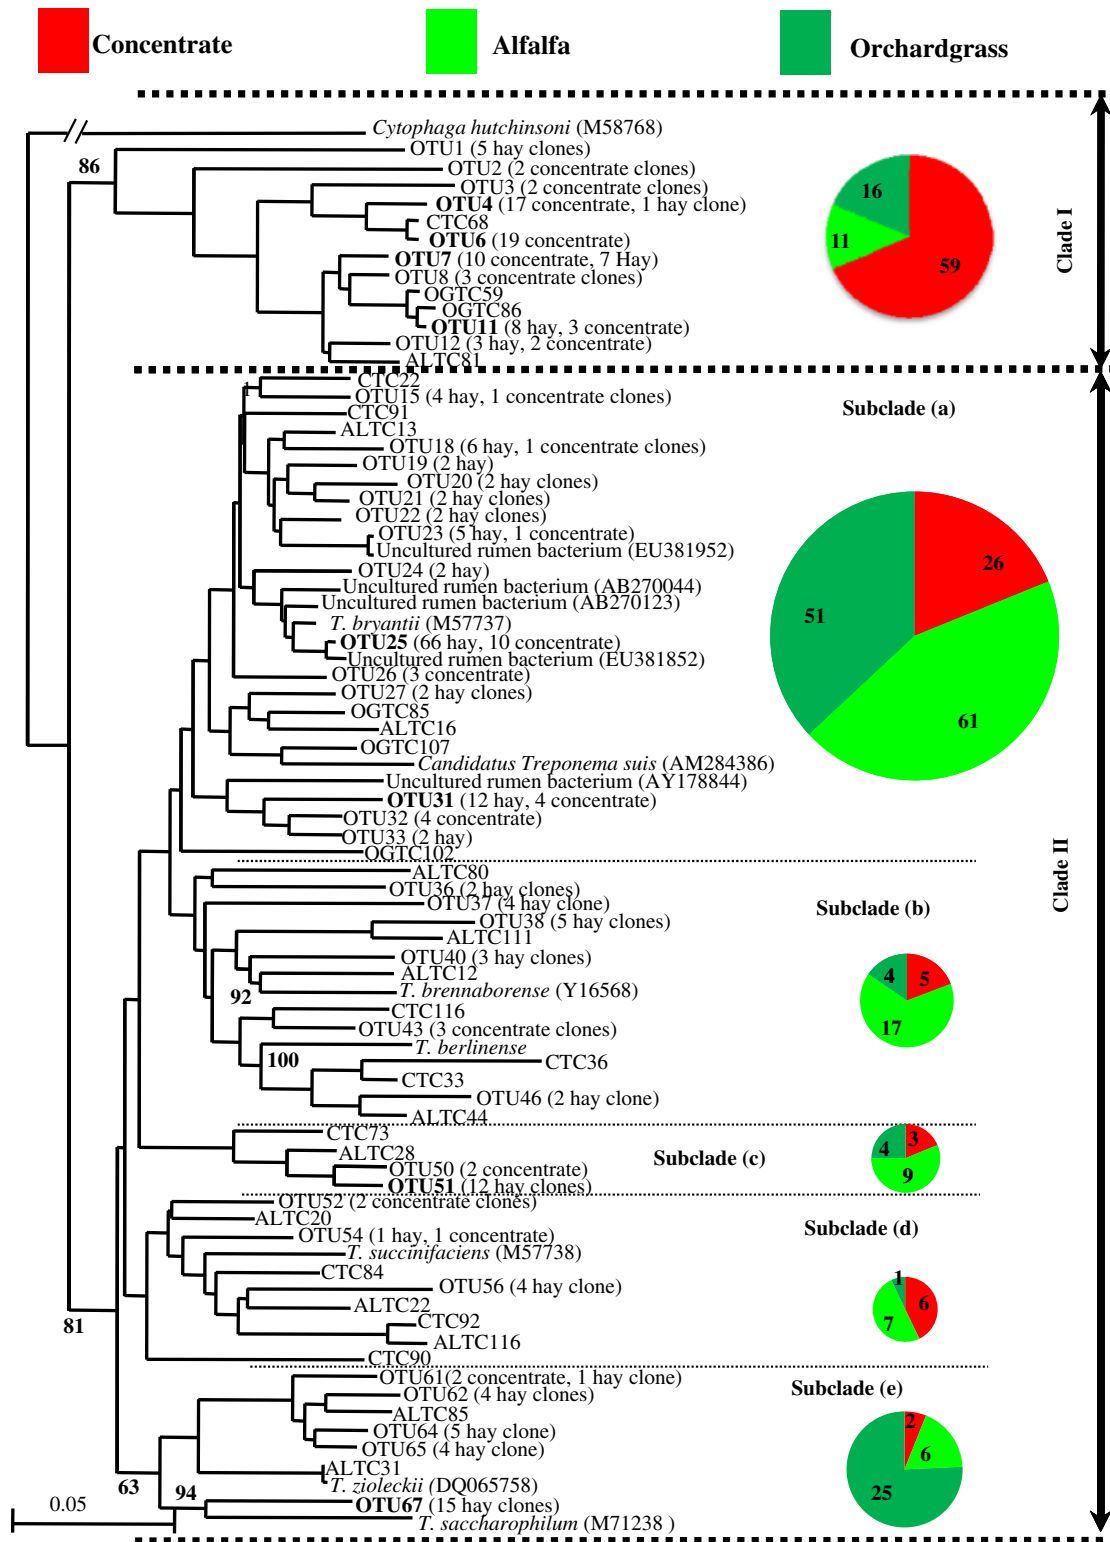

**Fig. 3.** Phylogenetic placement of rumen *Treponema* 16S rRNA gene clone sequences retrieved from sheep fed alfalfa, orchardgrass and concentrate-based diets. For the alfalfa, orchardgrass and concentrate diets, clone names, respectively, begin with ALTC, OGTC and CTC followed by clone number. The tree includes sequences of cultured rumen *Treponema* species and other uncultured rumen *Treponema* clones. Clones having < 97% sequence similarity were considered to belong to a distinct OTU; the number of clones in each OTU is indicated in brackets. OTUs containing > 10 clones are shown in bold. The pie charts in each clade show the distribution of clones from each library. The size of the pie chart corresponds to the number of clones in the clade. Bootstrap values > 50% are shown as the percentage of 1000 replicates. The horizontal bar represents nucleotide substitutions per sequence position.

Sequence analysis of 16S rRNA gene clone libraries constructed in this study for rumen *Treponema* revealed the presence of phylogenetically diverse and previously undetected OTUs of the rumen *Treponema* community. The DGGE data further showed diverse bands in the animals fed alfalfa and orchardgrass hay. This finding corresponded to the diversity analysis of the libraries, which showed higher Shannon index diversity values for the hay diets. A plausible explanation for this finding would be that more diverse members of *Treponema* are involved in the degradation of hay diets.

Considering the higher percentage (91.1%) of Good's coverage for the combined library, our library was comprehensive and likely represented the majority of *Treponema* in the sheep rumen. It has been suggested that a group-specific clone library approach could identify more diverse members in the target group than a universal library analysis (Hayashi et al., 2006). In human gut studies, attempts to recover diverse members of *Bacteroides* spp. by increasing the size of libraries constructed by universal primers did not result in a higher diversity of *Bacteroides* (Li et al., 2008). Preferential PCR amplification of certain groups of rumen microorganisms has been suggested as a possible reason for the difficulty in detecting a particular group with universal primers (Tajima et al., 2001), and this may explain the low level detection of *Treponema* sequences in previous studies (Whitford et al., 1998; Tajima et al., 1999; Ozutsumi et al., 2005). Therefore, the group-specific clone library approach that we followed in this study proved useful to obtain a comprehensive description of the diversity of *Treponema* in the rumen.

Phylogenetic analysis of the *Treponema* 16S rRNA gene sequences showed a closer phylogeny of clones retrieved from a particular diet. In the phylogenetic tree, clade I was mainly comprised of clones (58.4% of the overall concentrate clones) associated with concentrate feeding; while clade II predominantly consisted of *Treponema* clones (87.3% of the overall hay clones) associated with hay feeding. These findings suggest that closely related phylotypes of rumen *Treponema* associate with a given diet, and may play a role in the degradation of that particular diet in the rumen. This interpretation of the phylogenetic analysis was supported by results of the PCA of DGGE fingerprints of the *Treponema* community that showed separate clusters for *Treponema* associated with either the hay or the concentrate diets.

Pairwise comparison of each 16S rRNA gene library indicated that the composition of *Treponema* associated with the concentrate diet differed from those associated with the hay diets. Similarly, the *Treponema* community associated with each hay diet differed significantly ( $P = 0.001$ ). Therefore, differences observed among the libraries were attributed to the presence of phylotypes specifically associated with a given diet. Several studies have shown that some ruminal bacterial species are indeed very specialized, while others have a broad range of substrate specificity (Krause & Russell, 1996). Diet-dependent

shifts in the entire bacterial community have also been interpreted as changes caused by the specialized niches and substrate requirements of different rumen bacteria (Tajima et al., 2001; Welkie et al., 2010). Recently, we reported molecular evidence for the existence of diet-specific subpopulations of *Prevotella* that might be involved in the degradation of either hay or concentrate diets (Bekele et al., 2010). Collectively, these findings support the concept of functional specialization among rumen bacterial groups and even within a bacterial group such as *Treponema*.

Two OTUs (25 and 67) had a phylogenetic position closer to cultured species of *T. bryantii* and *T. saccharophilum*, respectively. These OTUs may have functions similar to that of the cultured close relatives. Cultured rumen *Treponema* strains do not break down cellulose, but are capable of catabolizing other structural polysaccharides such as pectin, xylan and fructan (Wojciechowicz & Ziolecki, 1979; Ziolecki, 1979; Ziolecki & Wojciechowicz, 1980; Pikhova et al., 2008), and also of utilizing hydrolysis products of plant polymers such as cellobiose, xylose, arabinose and galacturonic acid (Paster & Canale-Parola, 1985). Interestingly, the majority of clones belonging to OTUs 25 and 67 were obtained from the animals fed a hay diet. Therefore, these clones may be involved in rumen fiber degradation.

In conclusion, this study revealed the phylogenetic diversity of rumen *Treponema* in sheep rumen. The population size of ruminal *Treponema* was comparable to that of other representative ruminal species; however, the majority of the members of this group remain uncultured. The diet association of *Treponema* clones suggests the specialized metabolic niches of rumen treponemes related to the digestion of either a hay or concentrate diet. We demonstrated that a group-specific clone library approach can be a useful method to comprehensively profile the composition of specific target bacteria in the rumen, particularly of uncultured members. This study highlights the need for detailed profiling of the huge uncultured component of the rumen bacterial community in order to understand their role in the degradation of feed in the rumen.

## Acknowledgements

The authors acknowledge Prof. R.I. Mackie for his helpful suggestions and proofreading of the manuscript.

## References

- Altschul SE, Gish W, Miller W, Myers EW & Lipman DJ (1990) Basic local alignment search tool. *J Mol Biol* **215**: 403–410.
- Bekele ZA, Koike S & Kobayashi Y (2010) Genetic diversity and diet specificity of ruminal *Prevotella* revealed by 16S rRNA gene-based analysis. *FEMS Microbiol Lett* **305**: 49–57.



- Bryant MP (1952) The isolation and characteristics of a spirochete from the bovine rumen. *J Bacteriol* **64**: 325–335.
- Bryant MP & Burkey LA (1953) Numbers and some predominant groups of bacteria in the rumen of cows fed different rations. *J Dairy Sci* **36**: 218–224.
- Chao A (1984) Non-parametric estimation of the number of classes in a population. *Scand J Stat* **11**: 265–270.
- Choi BK, Paster BJ, Dewhirst FE & Gobel UB (1994) Diversity of cultivable and uncultivable oral spirochetes from a patient with severe destructive periodontitis. *Infect Immun* **62**: 1889–1895.
- Dewhirst FE, Tamer MA, Ericson RE, Lau CN, Levanos VA, Boches SK, Galvin JL & Paster BJ (2000) The diversity of periodontal spirochetes by 16S rRNA analysis. *Oral Microbiol Immun* **15**: 196–202.
- Edwards JE, McEwan NR, Anthony JT & Wallace RJ (2004) 16S rDNA library-based analysis of ruminal bacterial diversity. *Antonie van Leeuwenhoek* **86**: 263–281.
- Felsenstein J (1985) Confidence limits on phylogenies: an approach using the bootstrap. *Evolution* **39**: 783–791.
- Felsenstein J (2007) *PHYLIP-Phylogeny Inference Package (version 3.67)*. Distributed by the author, Department of Genome Sciences, University of Washington, Seattle, Available at <http://evolution.genetics.washington.edu/phylip.html>.
- Good IJ (1953) The population frequencies of species and the estimation of population parameters. *Biometrika* **40**: 237–264.
- Hayashi H, Sakamoto M, Kitahara M & Benno Y (2006) Diversity of the *Clostridium coccoides* group in human fecal microbiota as determined by 16S rRNA gene library. *FEMS Microbiol Lett* **257**: 202–207.
- Henriksen JR (2004) webLIBSHUFF. Available at <http://libshuff.mib.uga.edu>
- Koike S, Yoshitani S, Kobayashi Y & Tanaka K (2003) Phylogenetic analysis of fiber-associated rumen bacterial community and PCR detection of uncultured bacteria. *FEMS Microbiol Lett* **229**: 23–30.
- Koike S, Yabuki H & Kobayashi Y (2007) Validation and application of real-time polymerase chain reaction assays for representative rumen bacteria. *Anim Sci J* **78**: 135–141.
- Krause DO & Russell JB (1996) How many ruminal bacteria are there? *J Dairy Sci* **79**: 1467–1475.
- Li M, Wang B, Zhang M *et al.* (2008) Symbiotic gut microbes modulate human metabolic phenotypes. *P Natl Acad Sci USA* **105**: 2117–2122.
- Lilburn TG, Schmidt TM & Breznak JA (1999) Phylogenetic diversity of termite gut spirochaetes. *Environ Microbiol* **1**: 331–345.
- Ozutsumi Y, Tajima K, Takenaka A & Itabashi H (2005) The effect of protozoa on the composition of rumen bacteria in cattle using 16S rRNA gene clone libraries. *Biosci Biotech Bioch* **69**: 499–506.
- Paster BJ & Canale-Parola E (1985) *Treponema saccharophilum* sp. nov., a large pectinolytic spirochete from the bovine rumen. *Appl Environ Microb* **50**: 212–219.
- Paster BJ, Dewhirst FE, Weisburg WG, Fraser GJ, Tordo LA, Hespell RB, Stanton TB, Zablén L & Woese CR (1991) Phylogenetic analysis of the spirochetes. *J Bacteriol* **173**: 6101–6109.
- Paster BJ, Dewhirst FE, Cooke SM, Fussing V, Poulsen LK & Breznak JA (1996) Phylogeny of not-yet-cultured spirochetes from termite guts. *Appl Environ Microb* **62**: 347–352.
- Paster BJ, Boches SK, Galvin JL, Ericson RE, Lau CN, Levanos VA, Sahasrabudhe A & Dewhirst FE (2001) Bacterial diversity in human subgingival plaque. *J Bacteriol* **183**: 3770–3783.
- Piknova M, Wanda G, Miltko R, Peter J, Kasperowicz A & Michalowski T (2008) *Treponema zioleckii* sp. nov., a novel fructan utilizing species of rumen treponemes. *FEMS Microbiol Lett* **289**: 166–172.
- Saito N & Nei M (1987) The neighbour-joining method: a new method for constructing phylogenetic trees. *Mol Biol Evol* **4**: 406–425.
- Shannon CE & Weaver W (1949) *The Mathematical Theory of Communication*. University of Illinois Press, Urbana, IL.
- Shinkai T, Ueki T & Kobayashi Y (2010) Detection and identification of rumen bacteria constituting a fibrolytic consortium dominated by *Fibrobacter succinogenes*. *Anim Sci J* **81**: 72–79.
- Stackebrandt E & Goebel EM (1994) Taxonomic note: a place for DNA–DNA reassociation and 16S rRNA sequence analysis in the present species definition in bacteriology. *Int J Syst Bacteriol* **44**: 846–849.
- Stanton TB & Canale-Parola E (1979) Enumeration and selective isolation of rumen spirochetes. *Appl Environ Microb* **38**: 965–973.
- Stanton TB & Canale-Parola E (1980) *Treponema bryantii* sp. nov., a rumen spirochete that interacts with cellulolytic bacteria. *Arch Microbiol* **127**: 145–156.
- Stevenson DM & Weimer PJ (2007) Dominance of *Prevotella* and low abundance of classical ruminal bacterial species in the bovine rumen revealed by relative quantification real-time PCR. *Appl Microbiol Biot* **75**: 165–174.
- Sundset MA, Præsteng KE, Cann IK, Mathiesen SD & Mackie RI (2007) Novel rumen bacterial diversity in two geographically separated sub-species of reindeer. *Microbiol Ecol* **54**: 424–438.
- Tajima K, Aminov RI, Nagamine T, Ogata K, Nakamura M & Benno Y (1999) Rumen bacterial diversity as determined by sequence analysis of 16S rDNA libraries. *FEMS Microbiol Ecol* **29**: 159–169.
- Tajima K, Aminov RI, Nagamine T, Matsui H, Nakamura M & Benno Y (2001) Diet-dependent shifts in the bacterial population of the rumen revealed with real-time PCR. *Appl Environ Microb* **67**: 2766–2774.
- Tamura K, Dudley J, Nei M & Kumar S (2007) MEGA4: molecular evolutionary genetics analysis (MEGA) software version 4.0. *Mol Biol Evol* **24**: 1596–1599.
- Thompson JD, Gibson TJ, Plewniak F, Jeanmougin F & Higgins DG (1997) The CLUSTAL\_X windows interface: flexible strategies for multiple sequence alignment aided by quality analysis tools. *Nucleic Acids Res* **25**: 4876–4882.

- Watanabe K, Kodama Y & Harayama S (2001) Design and evaluation of PCR primers to amplify bacterial 16S ribosomal DNA fragments used for community fingerprinting. *J Microbiol Meth* **44**: 253–262.
- Welkie DG, Stevenson DM & Weimer PJ (2010) ARISA analysis of ruminal bacterial community dynamics in lactating dairy cows during the feeding cycle. *Anaerobe* **16**: 94–100.
- Whitford MF, Forster RJ, Beard CE, Gong JH & Teather RM (1998) Phylogenetic analysis of rumen bacteria by comparative sequence analysis of cloned 16S rRNA genes. *Anaerobe* **4**: 153–163.
- Wojciechowicz M & Ziolecki A (1979) Pectinolytic enzymes of large rumen treponemes. *Appl Environ Microb* **37**: 136–142.
- Yang S, Ma S, Chen J, Mao H, He Y, Xi D, Yang L, He T & Deng W (2010) Bacterial diversity in the rumen of Gayals (*Bos frontalis*), Swamp buffaloes (*Bubalus bubalis*) and Holstein cow as revealed by cloned 16S rRNA gene sequences. *Mol Biol Rep* **37**: 2063–2073.
- Yu Y, Breitbart B, McNairnie P & Rohwer F (2006) FastGroupII: a web-based bioinformatics platform for analyses of large 16S rDNA libraries. *BMC Bioinformatics* **7**: 57.
- Yu Z & Morrison M (2004) Improved extraction of PCR-quality community DNA from digesta and fecal samples. *BioTechniques* **36**: 808–812.
- Ziolecki A (1979) Isolation and characterization of large treponemes from the bovine rumen. *Appl Environ Microb* **37**: 131–135.
- Ziolecki A & Wojciechowicz M (1980) Small pectinolytic spirochetes from the rumen. *Appl Environ Microb* **39**: 919–922.
